# Supplementary material for: Predictors of COVID-19 Vaccine Intention: Evidence from Chile, Mexico, and Colombia
Source: MDPI journal article supplement (doi:10.3390/vaccines10071129), 2022-07-15
Supplement: s1 [file s1]

Supplementary Table S1: Sociodemographic characteristics and comparison between groups.

|                                    | Chile          | Mexico         | Colombia       | Difference test                    |
|------------------------------------|----------------|----------------|----------------|------------------------------------|
| Sex                                |                |                |                | $\chi^2 (4) = 6.68; p = .154$      |
| Women                              | 731            | 387            | 356            |                                    |
| Men                                | 288            | 176            | 168            |                                    |
| Age                                | 36.285 (13.77) | 29.025 (11.01) | 39.395 (17.23) | $F_{(2, 2107)} = 80.453, p < .001$ |
| Marital status                     |                |                |                | $\chi^2 (10) = 3233.399; p < .001$ |
| Single                             | 528            | 366            | 232            |                                    |
| Married                            | 301            | 72             | 180            |                                    |
| Widowed                            | 15             | 101            | 13             |                                    |
| Divorced                           | 51             | 10             | 13             |                                    |
| Separated                          | 34             | 4              | 15             |                                    |
| Cohabiting                         | 94             | 10             | 69             |                                    |
| Socioeconomic status               |                |                |                | $\chi^2 (8) = 134.577; p < .001$   |
| Lower class                        | 21             | 12             | 50             |                                    |
| Lower-middle class                 | 126            | 79             | 86             |                                    |
| Middle class                       | 420            | 320            | 199            |                                    |
| Upper-middle class                 | 333            | 137            | 127            |                                    |
| Upper class                        | 119            | 15             | 57             |                                    |
| Educational level                  |                |                |                | $\chi^2 (18) = 767.529; p < .001$  |
| No formal education                | 1              | 3              | 0              |                                    |
| Complete primary and middle school | 3              | 1              | 3              |                                    |
| Incomplete high school             | 6              | 1              | 62             |                                    |
| Complete high school               | 105            | 10             | 69             |                                    |
| Incomplete higher education        | 248            | 19             | 61             |                                    |
| Complete higher education          | 375            | 118            | 195            |                                    |

|                                |     |     |     |                                  |
|--------------------------------|-----|-----|-----|----------------------------------|
| Incomplete postgraduate degree | 62  | 129 | 32  | $\chi^2 (8) = 312.101; p < .001$ |
| Complete postgraduate degree   | 222 | 178 | 98  |                                  |
| Political orientation          |     |     |     |                                  |
| Far-left                       | 276 | 97  | 241 |                                  |
| Center-left                    | 259 | 80  | 106 |                                  |
| Center                         | 255 | 308 | 161 |                                  |
| Center-right                   | 155 | 49  | 0   |                                  |
| Far-right                      | 62  | 29  | 0   |                                  |

---

Supplementary Table S2: Standardized regression coefficients and standard errors (in parenthesis) of the model explaining beliefs about negative consequences of COVID-19 vaccine, conspiracy beliefs about COVID-19 vaccine, and social influence on COVID-19 vaccination intent.

| Socio-structural variables | Beliefs about negative consequences of COVID-19 vaccine |                   |                   | Conspiracy beliefs about COVID-19 vaccine |                   |                   | Social influence on COVID-19 vaccination intent |                   |                   |
|----------------------------|---------------------------------------------------------|-------------------|-------------------|-------------------------------------------|-------------------|-------------------|-------------------------------------------------|-------------------|-------------------|
|                            | Chile                                                   | Mexico            | Colombia          | Chile                                     | Mexico            | Colombia          | Chile                                           | Mexico            | Colombia          |
| Socioeconomic status       | -.127**<br>(.016)                                       | -.110**<br>(.016) | -.122**<br>(.016) | -.150**<br>(.017)                         | -.128**<br>(.017) | -.198**<br>(.017) | .103**<br>(.031)                                | .076**<br>(.031)  | .122**<br>(.031)  |
| Political orientation      | .044<br>(.013)                                          | .044<br>(.013)    | .036<br>(.013)    | .066**<br>(.015)                          | .064*<br>(.015)   | .053*<br>(.015)   | -.039<br>(.026)                                 | -.033<br>(.026)   | -.028<br>(.026)   |
| Educational level          | -.119**<br>(.012)                                       | -.169**<br>(.010) | -.165**<br>(.010) | -.126**<br>(.012)                         | -.176**<br>(.012) | -.172**<br>(.012) | .063**<br>(.019)                                | .076**<br>(.019)  | .077**<br>(.019)  |
| Age                        | .006<br>(.001)                                          | .006<br>(.001)    | .006<br>(.001)    | .109**<br>(.001)                          | .102**<br>(.002)  | .144**<br>(.001)  | -.104**<br>(.012)                               | -.085**<br>(.002) | -.124**<br>(.002) |
| R <sup>2</sup>             |                                                         | .043              |                   |                                           | .058              |                   |                                                 | .026              |                   |

Note. \*\*  $p \leq .001$ , \*  $p \leq .05$

Supplementary Table S3: Questions and answer for each item of the study.

| Scale and item                                                                                                           | Response format       |              |                               |                 |                      |
|--------------------------------------------------------------------------------------------------------------------------|-----------------------|--------------|-------------------------------|-----------------|----------------------|
|                                                                                                                          | Strongly disagree (1) | Disagree (2) | Neither disagree or agree (3) | Agree (4)       | Strongly agree (5)   |
| <b>Conspiracy beliefs about COVID-19 vaccine</b>                                                                         |                       |              |                               |                 |                      |
| The COVID-19 vaccine will contain a microchip to monitor people                                                          |                       |              |                               |                 |                      |
| The vaccine against COVID-19 has already been created, but they are withholding it to maintain control of the population |                       |              |                               |                 |                      |
| Big Pharma created COVID-19 to benefit from vaccines                                                                     |                       |              |                               |                 |                      |
| <b>Beliefs about negative consequences of COVID-19 vaccine</b>                                                           |                       |              |                               |                 |                      |
| The COVID-19 vaccine may increase the spread of the virus                                                                |                       |              |                               |                 |                      |
| I distrust the long-term effectiveness of the COVID-19 vaccine                                                           |                       |              |                               |                 |                      |
| If I get vaccinated against COVID-19, my chances of contracting the virus increase                                       |                       |              |                               |                 |                      |
| The COVID-19 vaccine will cause more complex effects than the virus can have                                             |                       |              |                               |                 |                      |
| I think the COVID-19 vaccine has more risks than other vaccines                                                          |                       |              |                               |                 |                      |
| I am afraid of the possible adverse effects of the COVID-19 vaccine                                                      |                       |              |                               |                 |                      |
| <b>Social influence on COVID-19 vaccination intent</b>                                                                   |                       |              |                               |                 |                      |
| I would consider getting vaccinated against COVID-19 if someone close to me does it                                      |                       |              |                               |                 |                      |
| <b>Vaccination intent against COVID-19</b>                                                                               |                       |              |                               |                 |                      |
| How likely are you to that you will be vaccinated against COVID-19?                                                      | Not likely (0)        | Unlikely (1) | Moderately likely (2)         | Very Likely (3) | Extremely likely (4) |
